# Supplementary material for: Topological investigation of the reaction mechanism of glycerol carbonate decomposition by bond evolution theory
Source: Royal Society of Chemistry journal article supplement (doi:10.1039/d0ra09755a), 2021-01-01
Supplement: d0ra09755a1.pdf [file d0ra09755a1.pdf]

## **SUPPORTING INFORMATION**

**Manuscript RA-ART-11-2020-009755**

### **Topological Investigation of the Reaction Mechanism of Glycerol Carbonate Decomposition by Bond Evolution Theory.**

Abel Idrice Adjieufack Vincent Liégeois, Ibrahim Ndassa Mbouombouo, and Benoît Champagne

**Table S1.** Selected single point electronic energies for the transition states and products as a function of the atomic basis set. Calculations were performed at the CCSD(T) and MP2 levels of approximation on MP2/6-311G(d,p) optimized geometry. In parentheses are given the TS1-to-TS2(a-b), TS1-to-TS3, P1-to-P2, and P1-to-P3 energy differences.

**S1A. CCSD(T) energies**

|             | <b>cc-pVDZ</b> | <b>aug-cc-pVDZ</b> | <b>cc-pVTZ</b> | <b>aug-cc-pVTZ</b> | <b>cc-pVQZ</b> |
|-------------|----------------|--------------------|----------------|--------------------|----------------|
| <b>TS1</b>  | 76.0           | 74.1               | 77.8           | 76.8               | 77.4           |
| <b>TS2a</b> | 82.9 (6.9)     | 79.8 (5.7)         | 83.9 (6.1)     | 82.7 (5.9)         | 83.6 (6.2)     |
| <b>TS2b</b> | 84.7 (8.7)     | 80.7 (6.6)         | 85.1 (7.3)     | 83.8 (7.0)         | 84.8 (7.4)     |
| <b>TS3</b>  | 77.7 (1.7)     | 77.6 (3.5)         | 78.4 (0.6)     | 78.3 (1.5)         | 78.7 (1.3)     |
| <b>R1</b>   | -8.3           | -3.3               | -2.7           | -1.1               | -2.2           |
| <b>R2</b>   | 17.8 (26.1)    | 20.4 (23.7)        | 19.8 (22.5)    | 20.8 (21.9)        | 19.9 (22.1)    |
| <b>R3</b>   | 14.2 (22.5)    | 12.7 (16.0)        | 12.2 (14.9)    | 11.9 (13.0)        | 11.6 (13.8)    |

**S1B. MP2 energies**

|             | <b>cc-pVDZ</b> | <b>aug-cc-pVDZ</b> | <b>cc-pVTZ</b> | <b>aug-cc-pVTZ</b> | <b>cc-pVQZ</b> |
|-------------|----------------|--------------------|----------------|--------------------|----------------|
| <b>TS1</b>  | 71.6           | 71.7               | 72.3           | 68.7               | 71.0           |
| <b>TS2a</b> | 80.5 (9.0)     | 79.5 (7.8)         | 80.2 (7.9)     | 76.4 (7.7)         | 78.7 (7.6)     |
| <b>TS2b</b> | 82.5 (10.9)    | 80.6 (8.9)         | 81.4 (9.1)     | 77.1 (8.4)         | 79.6 (8.6)     |
| <b>TS3</b>  | 73.7 (2.1)     | 73.5 (1.8)         | 73.4 (1.1)     | 73.1 (4.4)         | 73.2 (2.1)     |
| <b>R1</b>   | -8.3           | -3.3               | -2.7           | -1.1               | -2.2           |
| <b>R2</b>   | 17.8 (26.1)    | 20.4 (23.7)        | 19.8 (22.5)    | 20.8 (21.9)        | 19.9 (22.1)    |
| <b>R3</b>   | 14.2 (22.5)    | 12.7 (16.0)        | 12.2 (14.9)    | 11.9 (13.0)        | 11.6 (13.8)    |

**Table S2.** Basin Populations (in e) and IRC coordinates (RX, Bohr AMU<sup>1/2</sup>) along the TS1 reaction pathway.

| Basins       | SSD-I    |            | SSD-II      |            | SSD-III     |            | SSD-IV      |       | Product |
|--------------|----------|------------|-------------|------------|-------------|------------|-------------|-------|---------|
|              | Reactant | Last point | First point | Last point | First point | Last point | First point |       |         |
| LP(O1)       | 4.65     | 5.16       | 5.77        | 5.48       | 5.49        | 5.41       | 5.41        | 5.06  |         |
| LP(O3)       | 4.64     | 4.83       | 4.83        | 5.23       | 6.11        | 5.41       | 5.37        | 5.16  |         |
| LP(O6)       | 5.34     | 5.43       | 5.41        | 5.33       | 5.31        | 5.20       | 5.18        | 5.08  |         |
| SB(C4,C5)    | 2.00     | 2.10       | 2.11        | 2.24       | 2.23        | 2.21       | 2.22        | 2.08  |         |
| SB(O1,C5)    | 1.35     | 0.59       | -           | -          | -           | -          | -           | -     |         |
| SB/DB(O3,C4) | 1.36     | 1.37       | 1.41        | 1.48       | 1.51        | 2.11       | 2.14        | 2.41  |         |
| DB(C2,O6)    | 2.68     | 2.54       | 2.54        | 2.64       | 2.67        | 2.77       | 2.78        | 2.84  |         |
| SB/DB(O1,C2) | 1.66     | 1.82       | 1.82        | 2.21       | 2.22        | 2.57       | 2.59        | 2.84  |         |
| SB(C2,O3)    | 1.64     | 1.48       | 1.46        | 0.92       | -           | -          | -           | -     |         |
| SB(H1,C4)    | 2.07     | 2.00       | 2.00        | 1.73       | 1.70        | 1.56       | -           | -     |         |
| SB(H1,C5)    | -        | -          | -           | -          | -           | -          | 1.60        | 1.98  |         |
| IRC          | -9.42    | -2.36      | -2.22       | -0.28      | -0.14       | 1.53       | 1.66        | 14.00 |         |

**Table S3.** Basin Populations (in e) and IRC coordinates (RX, Bohr AMU<sup>1/2</sup>) along the TS2a reaction pathway.

| Basins       | SSD-I    |            | SSD-II      |            | SSD-III     |            | SSD-IV      |       | Product |
|--------------|----------|------------|-------------|------------|-------------|------------|-------------|-------|---------|
|              | Reactant | Last point | First point | Last point | First point | Last point | First point |       |         |
| LP(O1)       | 4.68     | 5.12       | 5.80        | 5.50       | 5.54        | 5.30       | 5.27        | 5.03  |         |
| LP(O3)       | 4.64     | 4.76       | 4.79        | 4.96       | 6.28        | 6.19       | 5.50        | 5.33  |         |
| LP(O6)       | 5.27     | 5.37       | 5.37        | 5.29       | 5.28        | 5.14       | 5.20        | 5.03  |         |
| SB(C2,O3)    | 1.68     | 1.57       | 1.55        | 1.32       | -           | -          | -           | -     |         |
| SB(C4,C5)    | 1.98     | 2.07       | 2.08        | 2.14       | 2.14        | 2.05       | 2.03        | 1.91  |         |
| SB(O1,C5)    | 1.38     | 0.68       | -           | -          | -           | -          | -           | -     |         |
| SB(O3,C5)    | -        | -          | -           | -          | -           | -          | 0.70        | 1.04  |         |
| DB(C2,O6)    | 2.66     | 2.55       | 2.55        | 2.64       | 2.63        | 2.78       | 2.72        | 2.84  |         |
| SB(O3,C4)    | 1.33     | 1.31       | 1.31        | 1.21       | 1.21        | 1.05       | 1.05        | 1.02  |         |
| SB/DB(O1,C2) | 1.66     | 1.79       | 1.80        | 2.12       | 2.11        | 2.61       | 2.64        | 2.81  |         |
| IRC          | -15.31   | -3.63      | -3.40       | -1.13      | -0.91       | 3.40       | 3.63        | 16.56 |         |

**Table S4.** Basin Populations (in e) and IRC coordinates (RX, Bohr AMU<sup>1/2</sup>) along the TS2b reaction pathway.

| Basins       | SSD-I    |            | SSD-II      |            | SSD-III     |            | SSD-IV      |       | Product |
|--------------|----------|------------|-------------|------------|-------------|------------|-------------|-------|---------|
|              | Reactant | Last point | First point | Last point | First point | Last point | First point |       |         |
| LP(O1)       | 4.63     | 4.83       | 4.89        | 4.97       | 6.32        | 6.05       | 5.44        | 5.34  |         |
| LP(O3)       | 4.63     | 5.17       | 5.75        | 5.62       | 5.55        | 5.26       | 5.28        | 5.04  |         |
| LP(O6)       | 5.31     | 5.44       | 5.38        | 5.39       | 5.39        | 5.16       | 5.16        | 5.04  |         |
| SB(C1,O3)    | -        | -          | -           | -          | -           | -          | 0.69        | 1.02  |         |
| SB(C4,C5)    | 2.00     | 2.09       | 2.10        | 2.13       | 2.12        | 2.02       | 2.01        | 1.92  |         |
| SB(O1,C5)    | 1.38     | 1.27       | 1.27        | 1.23       | 1.23        | 1.12       | 1.12        | 1.05  |         |
| SB(O3,C4)    | 1.67     | 0.60       | -           | -          | -           | -          | -           | -     |         |
| DB(C2,O6)    | 2.66     | 2.52       | 2.54        | 2.54       | 2.58        | 2.77       | 2.77        | 2.86  |         |
| SB(O1,C2)    | 1.63     | 1.52       | 1.47        | 1.21       | -           | -          | -           | -     |         |
| SB/DB(C2,O3) | 1.34     | 1.84       | 1.86        | 2.01       | 2.06        | 2.63       | 2.64        | 2.86  |         |
| IRC          | -12.83   | -2.72      | -2.53       | -1.17      | -0.97       | 3.31       | 3.45        | 11.85 |         |

**Table S5.** Basin Populations (in e) and IRC coordinates (RX, Bohr AMU<sup>1/2</sup>) along the TS3 reaction pathway.

| Basins       | SSD-I    |            | SSD-II      |            | SSD-III     |            | SSD-IV      |        | Product |
|--------------|----------|------------|-------------|------------|-------------|------------|-------------|--------|---------|
|              | Reactant | Last point | First point | Last point | First point | Last point | First point |        |         |
| LP(O8)       | 4.73     | 4.70       | 4.65        | 4.17       | 2.73        | 2.46       | 4.42        | 4.55   |         |
| SB(H3,C5)    | 2.10     | 2.08       | 2.09        | 2.12       | -           | -          | -           | -      |         |
| SB(H6,O8)    | 1.72     | 1.74       | 1.74        | 1.70       | 1.78        | 1.70       | 1.69        | 1.68   |         |
| LP(C5)       | -        | -          | 1.59        | 1.70       | 1.65        | 0.71       | -           | -      |         |
| P(H3)        | -        | -          | 0.53        | 0.52       | -           | -          | -           | -      |         |
| SB(C7,O8)    | 1.26     | 1.05       | 1.06        | 1.26       | 1.25        | 1.94       | -           | -      |         |
| SB(H3,O8)    | -        | -          | -           | -          | 0.53        | 1.74       | 1.74        | 1.70   |         |
| SB/DB(C5,C7) | 2.01     | 2.04       | 2.04        | 2.08       | 2.10        | 3.12       | 3.85        | 3.69   |         |
| IRC          | 10.87    | 0.86       | 0.73        | 0.00       | -0.12       | -2.44      | -2.56       | -16.50 |         |

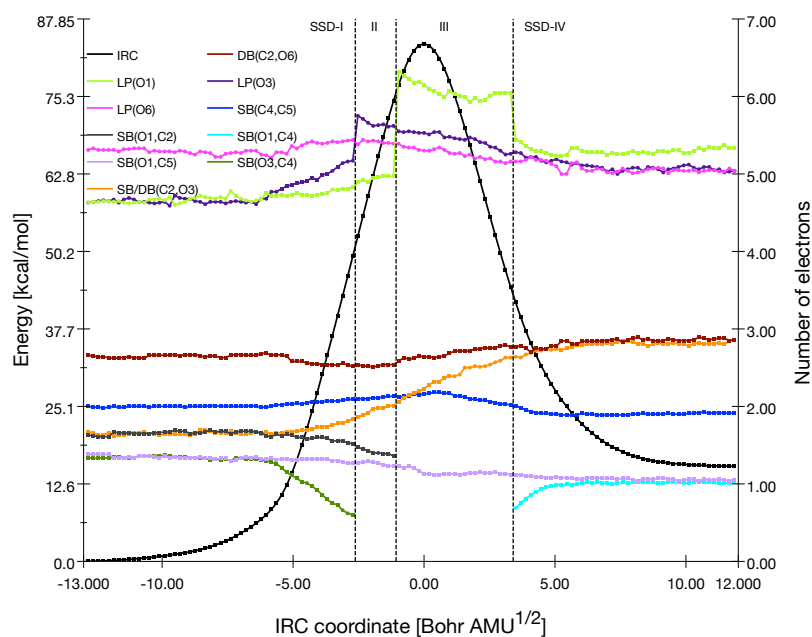

**Figure S1.** Population evolution (in e) of selected basins along the IRC associated with the TS2b reaction pathway together with the relative potential energy curve.

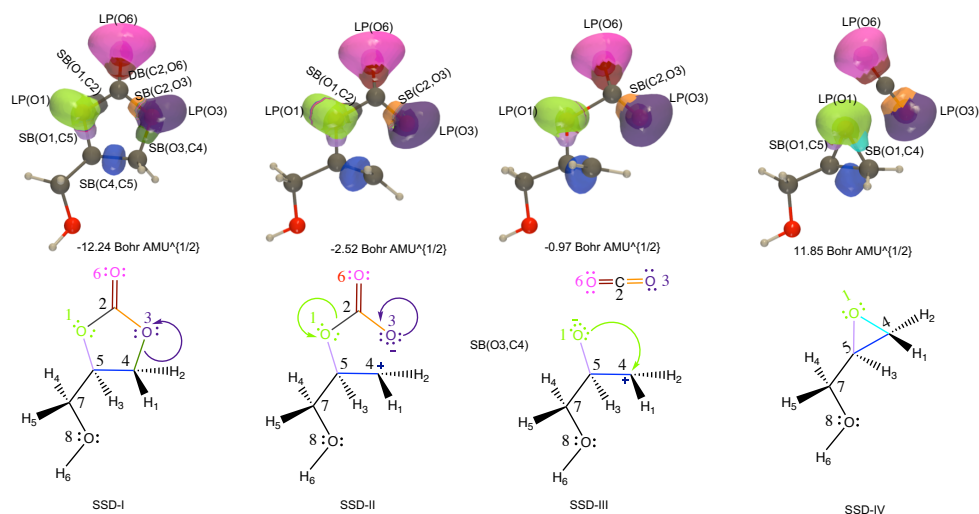

**Figure S2.** ELF basin isosurfaces ( $\eta = 0.75$ ) for specific points of the successive structural stability domains and Lewis structures along TS2b reaction pathway. The color labeling of the basins was performed according to Figure S1 and, for each point, the corresponding intrinsic reaction coordinate is provided.
